# Supplementary material
Source: publisher figshare collection journal article supplement (https://acs.figshare.com/ndownloader/files/25941194)
Supplement: Supplementary file 1 [file 25941194]

**Supporting information**

Authors: Ernesto Saiz, Fotis Sgouridis, Falko P. Driijfhout, Matthias Peichl, Mats B. Nilsson,  
and Sami Ullah.

Title: Chronic atmospheric reactive nitrogen deposition suppresses biological nitrogen fixation  
in peatlands.

Number of pages: 11

Number of figures: 1

Number of tables: 5

## Material and methods supplementary information

**Checks on  $^{15}\text{N}_2$  gas for contamination.** The  $^{15}\text{N}_2$  gas used for the incubations can be contaminated with readily available forms of  $^{15}\text{N}$  such as  $^{15}\text{NH}_3$  or  $^{15}\text{NO}_x$  (nitrate/nitrite),<sup>29</sup> which will result in erroneous figures of BNF rates. To avoid this problem, we tested the  $^{15}\text{N}_2$  gas (98 atom% Cambridge Isotope Laboratories Inc., USA) and we found some contamination that consisted of a difference in average results of enriched and non-enriched samples of  $\delta^{15}\text{N}$  ‰ of 0.03. Thus, this figure was used as a threshold below which no BNF was reported.

**Elemental analyses in *Sphagnum* tissue and peat.** A set of subsamples of pulverized *Sphagnum* tissue and peat from each of the species of each site were analysed for total C and N content. They were sent to the laboratory of the School of Geographical Sciences at the University of Bristol. They were analysed using a Thermo Scientific Flash EA 1112 Nitrogen and Carbon analyser. The instrument had a limit of detection (LOD) for both C and N of 0.01%, and the precision was determined by repeated analysis of a soil reference standard (0.21% N and 2.39% C) and the relative standard deviation (RSD) was below 5%.

Of the ground samples 0.2 grams were digested in 9 ml of  $\text{HNO}_3$  (>68%) trace metal grade and 1 ml of  $\text{H}_2\text{O}_2$  (30%) ACS grade using a microwave Mars 6 CEM (Mathews, NC, USA). The digests were diluted using deionised water and analysed for total P and metals (Mg, K, Ca, V, Mn, Co, Ni, Cu, Mo) using inductively coupled plasma – mass spectrometry (ICP-MS, Perkin Elmer NexION 300D, Waltham, MA, USA). An 8-point calibration generated through dilution of a certified ARISTAR multi-element standard solution for ICP (VWR, UK) was used to determine the values. Additionally, every 9 samples a blank and an external standard sample were included. The results were blank corrected. On average, the RSD was below 4% for all the elements while the LOD was 0.3  $\mu\text{g/g}$  for Mg, K, Ca, Ni, Mo, and P; and 0.1  $\mu\text{g/g}$  for V,

Mn, Co, and Cu.

**Ancillary measurements in the field.** After each incubation in the field we recorded mean air temperature (°C) for the sites on that date from stations nearby and measured the temperature in the moss and peat (5-10 cm depth) at the exact location where the samples were taken and incubated using a stem thermometer probe (Premier Farnell Ltd, UK). Additionally, at the exact same spots we measured dissolved oxygen (DO, mg/l) in surface porewater using a portable DO meter (HACH HQ40d with LDO probe, Loveland, CO, USA). pH using a pH meter (HI-98100 Hanna Instruments, Leighton Buzzard, UK). Electrical conductivity (EC, µS/cm) using an EC meter (HI-98300 Hanna Instruments, Leighton Buzzard, UK). And soil moisture (% vol) focused on capturing the moisture of the moss carpet (5-10 cm upper part) and peat layer (5-10 cm depth from the beginning of peat in hollows and hummocks) using a moisture meter type HH2 (Delta-T Devices, Burwell, UK).

Pore water samples were also taken from the incubation locations at each site. The samples were transported to the laboratory immediately after collection in a cool box with ice packs. Then they were filtered through a Restek 0.45µm PTFE syringe filter, 25mm diameter. The filtrates were analysed for nitrate ( $\text{NO}_3^-$ ), phosphate ( $\text{PO}_4^{3-}$ ), and sulphate ( $\text{SO}_4^{2-}$ ) concentration using an ion chromatograph (DIONEX ICS-1000, Sunnyvale, CA, USA). The limits of detection were 0.1 mg L<sup>-1</sup> for  $\text{NO}_3^-$ , <0.001 mg L<sup>-1</sup> for  $\text{PO}_4^{3-}$ , and 0.2 mg L<sup>-1</sup> for  $\text{SO}_4^{2-}$ . The results were blank corrected and the precision as RSD was <5%. Also, the samples were analysed for ammonium ( $\text{NH}_4^+$ ) using a flow injector analyser (Lachat QuikChem 8500, Hach, Loveland, CO, USA). The limit of detection for  $\text{NH}_4^+$  was 0.07 mg N L<sup>-1</sup>, the results were blank corrected, and the RSD was <5%.

Peat samples from hollows and hummocks (10 g) were extracted with 50 ml of deionised water for the determination of nitrate ( $\text{NO}_3^-$ ), phosphate ( $\text{PO}_4^{3-}$ ), and sulphate ( $\text{SO}_4^{2-}$ ); and with 50 ml

of 2 M KCl for the determination of ammonium ( $\text{NH}_4^+$ ). The peat slurries were shaken in an automatic shaker for 1 hour at 200 rpm, and subsequently centrifuged at 4000 rpm for 30 minutes followed by a double filtration in which every three samples a blank (deionised water) was included, first through a number 42 Whatman filter paper, and second through a 0.45  $\mu\text{m}$  PTFE Restek 25 mm diameter syringe filter. The analysis was performed as indicated above for the pore water.

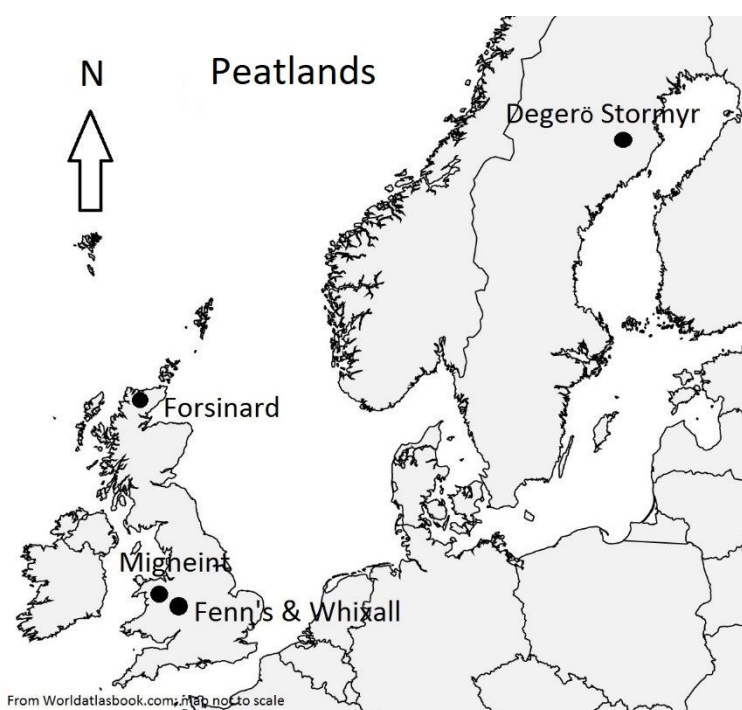

Figure S1. Location of the sampling sites in the UK and Sweden.

Table S1. Description of the treatments of the experimental plots at Degerö Stormyr.

| Plot | Treatment | Description                                                                                |
|------|-----------|--------------------------------------------------------------------------------------------|
| 0    | None      | Control of the experiment, no sampling (undisturbed).                                      |
| 1    | n s       | Low N and S: 15 and 10 kg ha <sup>-1</sup> y <sup>-1</sup> respectively.                   |
| 2    | N S t     | High N and S: 30 and 20 kg ha <sup>-1</sup> y <sup>-1</sup> respectively, plus greenhouse. |
| 3    | S         | High S: 20 kg ha <sup>-1</sup> y <sup>-1</sup> .                                           |
| 4    | t         | Greenhouse.                                                                                |
| 5    | S t       | High S: 20 kg ha <sup>-1</sup> y <sup>-1</sup> , plus greenhouse.                          |
| 6    | n s       | Low N and S: 15 and 10 kg ha <sup>-1</sup> y <sup>-1</sup> respectively.                   |
| 7    | S         | High S: 20 kg ha <sup>-1</sup> y <sup>-1</sup> .                                           |
| 8    | N S       | High N and S: 30 and 20 kg ha <sup>-1</sup> y <sup>-1</sup> respectively.                  |
| 9    | N t       | High N: 30 kg ha <sup>-1</sup> y <sup>-1</sup> , plus greenhouse.                          |
| 10   | S t       | High S: 20 kg ha <sup>-1</sup> y <sup>-1</sup> , plus greenhouse.                          |
| 11   | Control   | No treatment, just mire water added.                                                       |
| 12   | N         | High N: 30 kg ha <sup>-1</sup> y <sup>-1</sup> .                                           |
| 13   | N S t     | High N and S: 30 and 20 kg ha <sup>-1</sup> y <sup>-1</sup> respectively, plus greenhouse. |
| 14   | N S       | High N and S: 30 and 20 kg ha <sup>-1</sup> y <sup>-1</sup> respectively.                  |
| 15   | n s       | Low N and S: 15 and 10 kg ha <sup>-1</sup> y <sup>-1</sup> respectively.                   |
| 16   | t         | Greenhouse.                                                                                |

|    |         |                                                                          |
|----|---------|--------------------------------------------------------------------------|
| 17 | N t     | High N: 30 kg ha <sup>-1</sup> y <sup>-1</sup> , plus greenhouse.        |
| 18 | N       | High N: 30 kg ha <sup>-1</sup> y <sup>-1</sup> .                         |
| 19 | Control | No treatment, just mire water added.                                     |
| 20 | n s     | Low N and S: 15 and 10 kg ha <sup>-1</sup> y <sup>-1</sup> respectively. |

99

100

101 Table S2. Total reactive nitrogen deposition (Nr; Kg N ha<sup>-1</sup> yr<sup>-1</sup>).\* Nitrogen deposition by its  
 102 two major forms: NHx as reduced and NOy as oxidized (in kilo-equivalents per hectare per  
 103 year: Keq ha<sup>-1</sup> yr<sup>-1</sup> - 1 keq N ha<sup>-1</sup> yr<sup>-1</sup> is equal to 14 kg N ha<sup>-1</sup> yr<sup>-1</sup>). Ratio between the two types  
 104 of Nr forms. Percentage of each form that comprises the total Nr deposition. Median  $\delta^{15}\text{N}$   
 105 values of all studied species for each of the sites.

|                | Kg N ha <sup>-1</sup> yr <sup>-1</sup> | Keq ha <sup>-1</sup> yr <sup>-1</sup> |      |      | Ratio   | %   | %   | ‰                 |
|----------------|----------------------------------------|---------------------------------------|------|------|---------|-----|-----|-------------------|
|                | Total Nr <sub>dep</sub>                | Total                                 | NHx  | NOy  | NHx:NOy | NHx | NOy | δ <sup>15</sup> N |
| Fenn's&Whixall | 27                                     | 1.9                                   | 1.66 | 0.24 | 6.9     | 87  | 13  | -5.73             |
| Migneint       | 17                                     | 1.2                                   | 0.77 | 0.41 | 1.9     | 65  | 35  | -3.14             |
| Forsinard      | 6                                      | 0.4                                   | 0.23 | 0.17 | 1.4     | 58  | 43  | -1.49             |
| Degerö         | 2                                      | 0.1                                   | 0.07 | 0.07 | 1.1     | 52  | 48  | -2.26             |

\*Note that the Nrdep data for the British sites is for the period 2013-2015 and the data for Degerö (Sweden) is for 2014-2016.

106

107

108

109

110

111

112

113

114

115

116 Table S3. Environmental variables for pore water and peat measured during the sampling campaigns (UK sites in June, Swedish site in July).

| Abiotic factors                         | Units | Fenn's & Whixall         | Migneint                | Forsinard               | Degerö                  |
|-----------------------------------------|-------|--------------------------|-------------------------|-------------------------|-------------------------|
|                                         |       | Median (±MAD)            | Median (±MAD)           | Median (±MAD)           | Median (±MAD)           |
| Moss/peat Temperature                   | °C    | <b>12.4</b> (±0.9) a     | <b>12.9</b> (±1.1) b    | <b>10.2</b> (±0.2) c    | <b>17.1</b> (±2.4) d    |
| Dissolved Oxygen                        | mg/L  | <b>4.1</b> (±2.3) a      | <b>5.7</b> (±1.0) a     | <b>7.0</b> (±0.4) b     | <b>ND</b>               |
| pH                                      |       | <b>3.8</b> (±0.2) a      | <b>4.6</b> (±0.1) b     | <b>5.0</b> (±0.2) c     | <b>3.8</b> (±0.1) a     |
| Electrical Conductivity                 | µS/cm | <b>94.5</b> (±10.0) a    | <b>30.0</b> (±9.0) b    | <b>38.0</b> (±1.5) c    | <b>45.0</b> (±11.0) b   |
| <i>Sphagnum</i> moisture<br>volumetric  | % vol | <b>65.0</b> (±25.6) a    | <b>46.9</b> (±34.4) a   | <b>76.9</b> (±16.1) a   | <b>64.8</b> (±33.7) a   |
| <i>Sphagnum</i> moisture<br>gravimetric | g/g   | <b>20.7</b> (±8.7) a     | <b>17.4</b> (±4.8) a    | <b>17.4</b> (±6.82) a   | <b>16.0</b> (±7.9) a    |
| Pore Water NO <sub>3</sub> <sup>-</sup> | mg/L  | <b>0.256</b> (±0.002) a  | <b>0.101</b> (±0.008) b | <b>0.167</b> (±0.011) a | <b>0.112</b> (±0.008) b |
| Pore Water NH <sub>4</sub> <sup>+</sup> | mg/L  | <b>0.114</b> (±0.024) ac | <b>0.092</b> (±0.021) a | <b>0.059</b> (±0.005) c | <b>0.123</b> (±0.038) c |
| Pore Water PO <sub>4</sub>              | mg/L  | <b>0.279</b> (±0.050) a  | <b>0.333</b> (±0.102) a | <b>0.328</b> (±0.004) a | <b>0.242</b> (±0.013) a |
| Pore Water SO <sub>4</sub>              | mg/L  | <b>0.151</b> (±0.030) a  | <b>0.453</b> (±0.081) b | <b>0.537</b> (±0.084) b | <b>0.135</b> (±0.058) a |
| Peat NO <sub>3</sub> <sup>-</sup>       | µg/g  | <b>1.200</b> (±NA) a     | <b>1.013</b> (±0.389) a | <b>1.003</b> (±0.01) a  | <b>1.280</b> (±0.051) a |



|                                   |      |                          |                          |                          |                          |
|-----------------------------------|------|--------------------------|--------------------------|--------------------------|--------------------------|
| Peat NH <sub>4</sub> <sup>+</sup> | µg/g | <b>3.865</b> (±1.748) a  | <b>6.133</b> (±5.851) a  | <b>0.090</b> (±0.044) b  | <b>2.310</b> (±1.820) a  |
| Peat PO <sub>4</sub>              | µg/g | <b>1.735</b> (±0.632) a  | <b>10.366</b> (±0.639) b | <b>5.002</b> (±0.513) bc | <b>3.119</b> (±0.907) ac |
| Peat SO <sub>4</sub>              | µg/g | <b>4.881</b> (±3.831) ab | <b>3.876</b> (±1.463) a  | <b>2.268</b> (±0.471) b  | <b>1.669</b> (±1.039) b  |

117 Data shown is median (±MAD) per site for years 2016 and 2017 (except Forsinard: only 2017) (n=36 except for peat data n=12. Forsinard half  
118 these values). Sites with different letters have significantly different values.

119 Table S4. Elements in *Sphagnum* mosses.

|          | Fenn's&Whixall              | Migneint                    | Forsinard                  | Degerö                      |
|----------|-----------------------------|-----------------------------|----------------------------|-----------------------------|
| Elements | µg/g (±MAD)                 | µg/g (±MAD)                 | µg/g (±MAD)                | µg/g (±MAD)                 |
| Mg       | <b>512.86</b> (±136.23) a   | <b>1111.68</b> (±143.27) b  | <b>1238.57</b> (±101.75) b | <b>383.20</b> (±103.09) a   |
| K        | <b>4283.18</b> (±1243.21) a | <b>2497.15</b> (±920.92) b  | <b>2344.12</b> (±771.34) b | <b>3071.33</b> (±522.60) ab |
| Ca       | <b>305.29</b> (±90.02) a    | <b>428.71</b> (±387.29) a   | <b>428.09</b> (±132.73) a  | <b>251.39</b> (±161.13) a   |
| V        | <b>79.37</b> (±0.79) a      | <b>78.41</b> (±1.26) b      | <b>73.90</b> (±4.17) b     | <b>74.27</b> (±0.48) b      |
| Mn       | <b>83.25</b> (±18.08) a     | <b>79.80</b> (±30.94) a     | <b>31.83</b> (±4.32) a     | <b>41.47</b> (±41.47) a     |
| Co       | <b>19.42</b> (±0.31) a      | <b>19.61</b> (±0.70) ab     | <b>16.46</b> (±1.83) bc    | <b>13.17</b> (±0.11) c      |
| Ni       | <b>296.10</b> (±1.67) a     | <b>293.27</b> (±4.15) b     | <b>246.73</b> (±1.46) bc   | <b>244.84</b> (±1.21) c     |
| Cu       | <b>55.88</b> (±0.52) a      | <b>55.68</b> (±0.97) a      | <b>48.08</b> (±0.98) a     | <b>&lt;LOD</b>              |
| Mo       | <b>331.39</b> (±1.96) a     | <b>331.34</b> (±8.08) ab    | <b>287.07</b> (±4.33) b    | <b>286.34</b> (±1.49) b     |
|          | mg/g (±MAD)                 | mg/g (±MAD)                 | mg/g (±MAD)                | mg/g (±MAD)                 |
| C        | <b>441.32</b> (±4.16) a     | <b>435.90</b> (±4.46) b     | <b>442.13</b> (±5.62) ab   | <b>441.03</b> (±2.52) a     |
| N        | <b>5.57</b> (±0.68) a       | <b>5.48</b> (±0.55) a       | <b>6.88</b> (±1.64) a      | <b>5.20</b> (±0.60) a       |
| P        | <b>0.41</b> (±0.03) a       | <b>0.34</b> (±0.05) b       | <b>0.34</b> (±0.12) b      | <b>0.29</b> (±0.02) c       |
| Ratios   |                             |                             |                            |                             |
| C:N      | <b>79.68</b> (±11.46) a     | <b>79.91</b> (±9.06) a      | <b>65.24</b> (±14.05) a    | <b>85.79</b> (±9.63) a      |
| C:P      | <b>1046.29</b> (±74.30) a   | <b>1333.27</b> (±188.40) bc | <b>1265.01</b> (±646.57) b | <b>1537.57</b> (±85.49) c   |
| N:P      | <b>11.99</b> (±0.73) a      | <b>16.39</b> (±1.43) a      | <b>20.75</b> (±3.83) a     | <b>17.00</b> (±1.69) a      |

120 Data shown is median (±MAD) per site (n=12). Sites with different letters are significantly

121 different.

122

123

124

125 Table S5. Elements in peat.

|                 | <b>Fenn's&amp;Whixall</b>           | <b>Migneint</b>                     | <b>Forsinard</b>                    | <b>Degero</b>                       |
|-----------------|-------------------------------------|-------------------------------------|-------------------------------------|-------------------------------------|
| <b>Elements</b> | $\mu\text{g/g}$ ( $\pm\text{MAD}$ ) |
| Mg              | <b>480.21</b> ( $\pm 33.05$ ) a     | <b>335.31</b> ( $\pm 26.44$ ) b     | <b>1044.35</b> ( $\pm 35.43$ ) a    | <b>314.41</b> ( $\pm 85.16$ ) b     |
| K               | <b>&lt;LOD</b>                      | <b>33.91</b> ( $\pm 12.45$ ) a      | <b>61.14</b> ( $\pm 9.67$ ) ab      | <b>165.98</b> ( $\pm 21.48$ ) b     |
| Ca              | <b>922.40</b> ( $\pm 42.29$ ) a     | <b>139.53</b> ( $\pm 63.14$ ) b     | <b>197.76</b> ( $\pm 57.11$ ) bc    | <b>413.19</b> ( $\pm 149.03$ ) ac   |
| V               | <b>114.90</b> ( $\pm 1.88$ ) a      | <b>79.58</b> ( $\pm 1.01$ ) b       | <b>69.63</b> ( $\pm 0.94$ ) b       | <b>74.59</b> ( $\pm 0.81$ ) b       |
| Mn              | <b>&lt;LOD</b>                      | <b>&lt;LOD</b>                      | <b>&lt;LOD</b>                      | <b>&lt;LOD</b>                      |
| Co              | <b>27.53</b> ( $\pm 0.80$ ) a       | <b>21.75</b> ( $\pm 0.39$ ) a       | <b>17.84</b> ( $\pm 0.14$ ) ab      | <b>13.05</b> ( $\pm 0.17$ ) b       |
| Ni              | <b>417.10</b> ( $\pm 5.99$ ) a      | <b>291.85</b> ( $\pm 4.95$ ) ab     | <b>244.18</b> ( $\pm 0.10$ ) ab     | <b>239.46</b> ( $\pm 5.51$ ) b      |
| Cu              | <b>289.80</b> ( $\pm 75.85$ ) a     | <b>172.95</b> ( $\pm 28.40$ ) b     | <b>113.25</b> ( $\pm 29.20$ ) b     | <b>16.69</b> ( $\pm 10.94$ ) b      |
| Mo              | <b>465.02</b> ( $\pm 6.79$ ) a      | <b>326.94</b> ( $\pm 4.02$ ) ab     | <b>283.11</b> ( $\pm 8.33$ ) ab     | <b>281.37</b> ( $\pm 4.17$ ) b      |
|                 | $\text{mg/g}$ ( $\pm\text{MAD}$ )   |
| C               | <b>512.26</b> ( $\pm 1.38$ ) ac     | <b>465.36</b> ( $\pm 0.77$ ) b      | <b>533.33</b> ( $\pm 1.23$ ) c      | <b>481.21</b> ( $\pm 1.82$ ) ab     |
| N               | <b>12.23</b> ( $\pm 0.02$ ) ab      | <b>17.00</b> ( $\pm 0.07$ ) c       | <b>15.79</b> ( $\pm 0.02$ ) bc      | <b>10.76</b> ( $\pm 1.77$ ) a       |
| P               | <b>0.29</b> ( $\pm 0.01$ ) a        | <b>0.77</b> ( $\pm 0.02$ ) b        | <b>0.29</b> ( $\pm 0.00$ ) a        | <b>0.54</b> ( $\pm 0.13$ ) ab       |
| <b>Ratios</b>   |                                     |                                     |                                     |                                     |
| C:N             | <b>41.80</b> ( $\pm 0.03$ ) a       | <b>27.37</b> ( $\pm 0.16$ ) b       | <b>33.83</b> ( $\pm 0.14$ ) ab      | <b>45.44</b> ( $\pm 7.62$ ) a       |
| C:P             | <b>1745.04</b> ( $\pm 18.31$ ) ab   | <b>607.77</b> ( $\pm 9.18$ ) c      | <b>1852.65</b> ( $\pm 16.86$ ) a    | <b>951.04</b> ( $\pm 240.10$ ) bc   |
| N:P             | <b>40.30</b> ( $\pm 0.33$ ) ab      | <b>22.20</b> ( $\pm 0.46$ ) b       | <b>54.93</b> ( $\pm 0.07$ ) a       | <b>21.96</b> ( $\pm 8.72$ ) b       |

126 Data shown is median ( $\pm\text{MAD}$ ) per site (n=6). Sites with different letters are significantly  
 127 different.

128

129

130
